# Supplementary material
Source: ML conference proceedings conference paper supplement (https://proceedings.mlr.press/v33/oates14.html)
Supplement: Supplementary file 1 [file oates14-supp.zip]

Archive with 2 entries (2 files):
- SLTs.m
- Supplemental Text.pdf
